# Supplementary material
Source: Elsevier journal article supplement (https://www.sciencedirect.com/science/article/pii/S1575181318303437)
Supplement: mmc1 [file S1575181318303437:mmc1.pdf]

## MATERIAL SUPPLEMENTARIO

**Tabla 1S. Estudios primarios de ginecología incluidos en las revisiones sistemáticas**

| Autor                 | Diseño                                | Simulador                    | Competencias                                                                                                                                          | Desenlace                                                                                                                      | RS incluyen estudios ginecología |   |   |   |   |   |   |   |   |   |
|-----------------------|---------------------------------------|------------------------------|-------------------------------------------------------------------------------------------------------------------------------------------------------|--------------------------------------------------------------------------------------------------------------------------------|----------------------------------|---|---|---|---|---|---|---|---|---|
|                       |                                       |                              |                                                                                                                                                       |                                                                                                                                | 1                                | 2 | 3 | 4 | 5 | 6 | 7 | 8 | 9 |   |
| Lentz 2001 (42)       | Controlado No aleatorizado            | CSC                          | 1)Sutura 2) nudo 3) intracorporeo 4 )transferencia de objetos 5) canulación                                                                           | Validez de constructo para escalas de desempeño global, tarea individual. Costo 50 dólares y 30 horas de facultad.             |                                  |   |   | X |   |   |   |   |   |   |
| Ficher 2005(43)       | Controlado No aleatorizado            | VS / LTS 2000                | 1)Transferencia de objetos, 2) corte de patrones 3) <i>Clipping</i> 4) endoasa 5) fijación de malla 6) sutura y nudo instracorporeo 7) extracorpóreos | Aumenta puntaje de coordinación, de sutura y puntaje total, validez de constructo para el simulador                            |                                  |   |   |   |   |   | X |   |   |   |
| Aggarwal 2006(44)     | Controlado No aleatorizado            | SRV/ Lap Sim                 | 1) Navegación de cámara 2) Manejo embarazo ectópico                                                                                                   | 1)Mejoría de puntaje de tiempo, sangrado, economía de movimientos 2) Diferencias significativas en novatos                     | X                                |   |   |   |   | X |   |   |   |   |
| Larsen 2006 (35)      | Aleatorizado controlado ciego         | SRV LapSym                   | 1) levantar 2) agarrar 3) cortar 4)clipping                                                                                                           | 1) Mejoría de tiempo 2)Mejoría puntaje global                                                                                  | X                                |   |   |   |   |   |   |   |   |   |
| Hart 2006 (45)        | Observacional prospectivo / analítico | SRV                          | 1) Salpingectomia, salpingostomia o ligadura tubárica                                                                                                 | 1) Mejoría de puntaje global 2)Mejor puntaje en OSALS 3) mejoría de tiempo                                                     | X                                |   |   |   |   |   |   |   |   |   |
| Banks 2007 (46)       | controlado Aleatorizado               | VS                           | 1) Sutura 2)nudos 3) salpingectomia                                                                                                                   | 1)Mejoría en puntaje global 2) mejoría en tasa aprobado/fallido                                                                |                                  | X |   |   |   | X |   |   |   |   |
| Clevin 2008 (47)      | Ensayo controlado no aleatorizado     | CSC                          | 1) navegación cámara e instrumentos 3) coordinación 4) Agarre 5) levantar 6)Corte 7) <i>Clipping</i>                                                  | 1)Mejoría de tiempo 2)Menor daño de tejido 3) más economía de movimientos                                                      |                                  | X |   |   |   |   |   |   |   |   |
| Arden 2008(48)        | Aleatorizado Controlado               | CSC / Pelv-Sim               | 1) Cierre de cúpula 2) ligadura de infundibulopelvico 3) transposición de ovario 4) cierre de fascia                                                  | 1)Mejoría en tiempo puntaje global 2) No mejoría en ligamento infundíbulo pélvico ni cierre de fascia                          |                                  |   |   | X |   |   |   |   |   |   |
| Kolman 2008 (49)      | Ensayo controlado no aleatorizado     | CSC                          | 1) Transferencia de objetos 2) Tracción y agarre 3) Corte de patrones 4) Nudos intracorporeos                                                         | 1) validez de constructo 2) Mejor puntaje global                                                                               |                                  |   |   |   |   |   | X |   |   |   |
| Larsen 2009 (40)      | Observacional Prospectivo Analítico   | SRV / LapSym                 | 1) levantar 2) agarrar 3) cortar 4) clipping                                                                                                          | Validez de constructo en habilidades básicas y procedimiento de embarazo ectópico                                              |                                  |   | X |   | X |   |   | X |   |   |
| Sansregret *2009 (50) | Ensayo controlado no aleatorizado     | CSC y VS / LTS2000 y MISTELS | 1) Transferencia objetos, 2) manipulación de anillo 3) Canulación 4) Nudos deslizantes 6) Nudo extracorpóreo 7)Nudo intracorporeo 8) Corte            | 1) Mejoría del puntaje global 2) correlación LTS2000-MISTELS                                                                   |                                  |   |   |   |   |   | X |   |   |   |
| Zheng 2010 (51)*      | Observacional descriptivo             | CSC                          | 1) Transferencia de objeto 2) Corte de patrón. 3) Nudo intracorporeo 4) Suturar con extracorpórea                                                     | Nivel de experiencia y confianza se correlacionan con parámetros del FLS, no con la evaluación de conocimientos del FLS.       |                                  |   |   |   |   |   | X |   |   |   |
| Sliwinski 2010 *(52)  | Ensayo controlado no aleatorizado     | SRV                          | 1) Manipulación de instrumentos 2) Navegación 3) coordinación 4) Agarre 5)Levantar 6) corte 7) <i>Clipping</i>                                        | 1) Mejoría de habilidad visuoespacial intrínseca estática 2)Mejoría de habilidad visuoespacial dinámica extrínseca, en 2D y 3D |                                  |   |   |   |   |   |   |   |   | X |
| Hiemstra 2011(53)     | Estudio de cohorte prospectiva        | CSC                          | 1) Nudos intracorpóreos                                                                                                                               | 1) Mejoría en tiempo 2) mejoría en economía movimiento                                                                         |                                  |   |   |   |   |   |   | X |   |   |
| Gala 2013 (7) *       | multicéntrico, aleatorizado           | CSC                          | 1) <i>Clipping</i> , 2) agarrar, 3) levantar, 4) transferencia de objetos 5) corte de patrones 6) <i>Pomeroy</i>                                      | 1) Mejoría en tiempo, 2) Mejoría puntajes OSAT.                                                                                |                                  |   |   |   |   | X |   |   |   |   |
| Ahlborg 2013 (54)     | prospectivo de cohortes               | SRV                          | Ubicación visoespacial. Ligadura tubarica. Salpingectomía.                                                                                            | Capacidad visoespacial está relacionada con el rendimiento en procedimientos de laparoscopia.                                  |                                  |   |   |   |   |   |   |   |   | X |

(1): Tijssen 2010, (2) Al-Kadi 2012, (3) Larsen 2012, (4) Gravante 2013, (5) Nagendran 2013, (6) Vandervilt 2015, (7) Zendejas 2016, (8) Aleker 2016, (9) Kramp 2016, \*: No encontrado en nuestra revisión, MISTELS: McGill Inanimate System for Training and Evaluation of Laparoscopic Skill, CSC: Cajas de Simulación Convencional, SRV: Simulador de Realidad Virtual VS: Videosimulador RS: Revisiones sistemáticas
